# Supplementary material for: Trends in Selective Internal Radiation Therapy (SIRT) for Treating Hepatocellular Carcinoma, Cholangiocarcinoma, and Liver Metastasis: A Total Population Analysis from 2006 to 2021 in Germany
Source: MDPI journal article supplement (doi:10.3390/curroncol30120752), 2023-12-05
Supplement: s1 [file s1]

### Supplementary data:

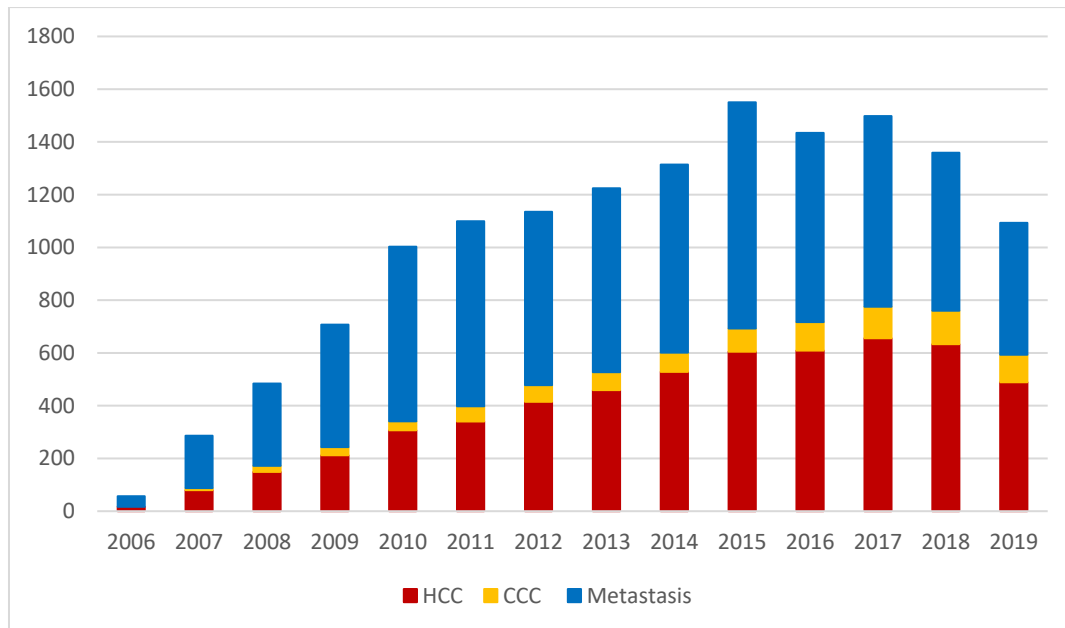

**Figure S1.** Absolute numbers of SIRT procedures in Germany for HCC (red), CCC (orange) and liver metastasis (blue) between 2006 to 2019 (source: Destatis).
